# Supplementary material for: Northern Hemisphere ice sheets and ocean interactions during the last glacial period in a coupled ice sheet-climate model
Source: Copernicus journal article supplement (doi:10.5194/cp-2024-51), 2024-08-07
Supplement: Supplementary file 1 [file cp-2024-51-supplement.pdf]

# Supplement of 'Northern Hemisphere ice sheets and ocean interactions during the last glacial period in a coupled ice sheet-climate model'

## S1. Model parameters

**Table S1a** : Main parameters of the ECBILT module (atmosphere component).

| Parameter | Definition                                                                                                              | This study ( <i>default</i> ) |
|-----------|-------------------------------------------------------------------------------------------------------------------------|-------------------------------|
| ampwir    | Scaling coefficient for the longwave radiation scheme, excluding the equator area                                       | 1.0                           |
| ampeqir   | Same, for the equator area between 15°S and 15°N                                                                        | 1.8                           |
| expir     | Exponent for the longwave radiation scheme                                                                              | 0.4                           |
| relhmax   | maximum relative humidity before saturation                                                                             | 0.83                          |
| hmoisr    | reduction factor of mountain heights in order to tune the amount of water that is allowed to pass a topographic barrier | 0.5                           |
| umoisr    | reduction factor of 800 hPa winds used in advecting the moisture                                                        | 0.6                           |
| rrdef1    | Rossby radius of deformation layer 1 (200 - 500 hPa)                                                                    | 0.13                          |
| rrdef2    | Rossby radius of deformation layer 2 (500 - 800 hPa)                                                                    | 0.07                          |
| cwdrag    | drag coefficient to compute wind stress                                                                                 | $2.1 * 10^{-3}$               |
| cdrag     | same to compute sensible and latent heat fluxes                                                                         | $1.4 * 10^{-3}$               |
| uv10rfx   | reduction of the wind speed between 800 hPa and 10 m                                                                    | 0.8                           |
| dragan    | rotation of the wind vector in the boundary layer                                                                       | 15.0                          |
| alphd     | albedo of snow                                                                                                          | 0.72                          |
| alphdi    | albedo of bare ice                                                                                                      | 0.62                          |
| alphs     | albedo of melting snow                                                                                                  | 0.53                          |
| albice    | albedo of melting ice (general)                                                                                         | 0.44                          |
| albin     | albedo of melting ice (arctic)                                                                                          | 0.44                          |
| cgren     | increase in snow/ice albedo under cloudy conditions                                                                     | 0.04                          |
| corAN     | reduction in precipitation over the North Atlantic                                                                      | -0.085                        |
| corPN     | reduction in precipitation over the North Pacific                                                                       | 1.0                           |
| corAS     | reduction in precipitation over the South Atlantic                                                                      | -0.085                        |
| corAC     | reduction in precipitation over the Arctic                                                                              | -0.25                         |
| mag_alpha | coefficient for the climate sensitivity                                                                                 | 2.0 ( <i>1.0</i> )            |
| evfac     | maximum evaporation factor over land                                                                                    | 1.0                           |

**Table S1b** : Main parameters of the CLIO module (ocean component).

| Parameter | Definition                                                 | This study ( <i>default</i> ) |
|-----------|------------------------------------------------------------|-------------------------------|
| bering    | Scaling factor for computing the Bering Strait throughflow | 0.0 ( <i>0.3</i> )            |
| ai        | Coefficient of isopycnal diffusion                         | 300                           |
| aitd      | Gent-McWilliams thickness diffusion coefficient            | 300                           |
| ahs       | Horizontal diffusivity for scalars [ $m^2s^{-1}$ ]         | 100                           |
| ahu       | Horizontal viscosity [ $m^2s^{-1}$ ]                       | $10^5$                        |

The tables of parameter values allow comparison with previous work [1,2,3].

**Table S1c** : Main parameters of GRISLI (ice sheet model).

| Parameter | Definition                                                                | This study    |
|-----------|---------------------------------------------------------------------------|---------------|
| $E_f$     | Flow enhancement factor for vertical shearing with a Glen viscosity       | 1.826         |
| $c_f$     | Basal drag parameter [ $yr.m^{-1}$ ]                                      | $3 * 10^{-4}$ |
| $\lambda$ | Longwave radiation coefficient for melt computation [ $W.m^{-2}.K^{-1}$ ] | 10            |
| $c_{rad}$ | Radiative parameter for melt computation [ $W.m^{-2}$ ]                   | -40           |

These can be compared with parameters in [4,5].

## S2. Information about the freshwater coupling

The continental ice melt fluxes are computed in GRISLI each year. These are distributed to the oceanic model over the following year. For the grounded ice sheet, surface melt is routed to the nearest oceanic grid cell following surface topography while the oceanic basal melt and the calving flux are transferred at the ocean surface where they occur. We take into account the local latent heat flux associated with the calving flux that corresponds to the melting of icebergs by the ocean, and the ocean temperatures are adjusted.

In the accelerated experiments, we do not maintain water conservation as we cannot conserve both total ice mass change and the rate of mass change. Indeed, in the accelerated experiments, for example with an acceleration factor of 10, the total mass change results from the melting of the ice sheet over 10 consecutive years. If we conserve this total mass change, the ocean model (CLIO) would receive a freshwater flux that is 10 times larger than the annual mean flux. While this approach is possible, it could have undesirable effects on oceanic circulation, such as an AMOC slowdown due to the large input of freshwater. Conversely, if we provide CLIO with the mean annual freshwater flux, we only account for one-tenth of the total mass change. Therefore, to obtain our initial conditions from the long spin up simulations, we conserve the total ice mass change and not the rate of mass change.

Below, INIT corresponds to the last 1500 years of the long spin-up simulation (no freshwater flux from the ice sheet to the ocean model) with asynchronous coupling described in section 2.2.1. CTRL is the continuation of the INIT simulation yet climate and ice sheets are annually coupled. Figure S2 shows both control simulations with and without freshwater flux as well as the perturbation experiment with multiplicative factor 100 (X100). It is clear that the inclusion of freshwater flux from the ice sheets to the ocean produces a global mean salinity decay when ice sheets volume is decreasing. In the CTRL experiments the discrepancies between with or without freshwater fluxes are small, with a mean difference of  $\pm 0.0003$  psu.

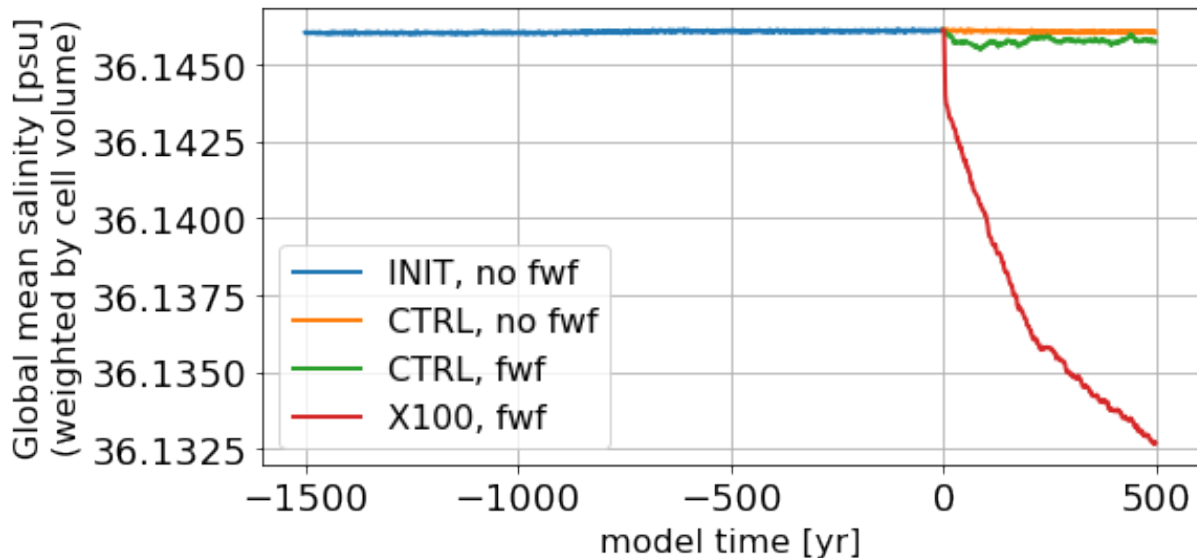

**Figure S2. Freshwater contribution to total ocean mean salinity.**

Global mean salinity in different experiments with and without freshwater flux from the ice sheet model to the ocean model.

### S3. Accumulation anomalies during the perturbation

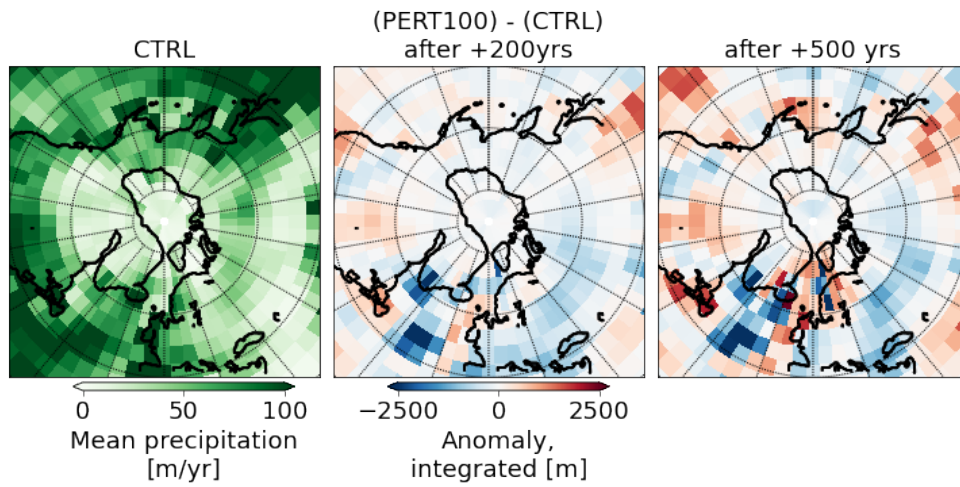

**Figure S3.** Precipitations response to the perturbation.

(left) Mean over the control simulation [m/yr] and integrated anomaly [m] (middle) after 200 years and (right) after 500 years, between perturbation experiment with factor 100 and the control simulation.

#### S4. Complements on Atlantic meridional circulation

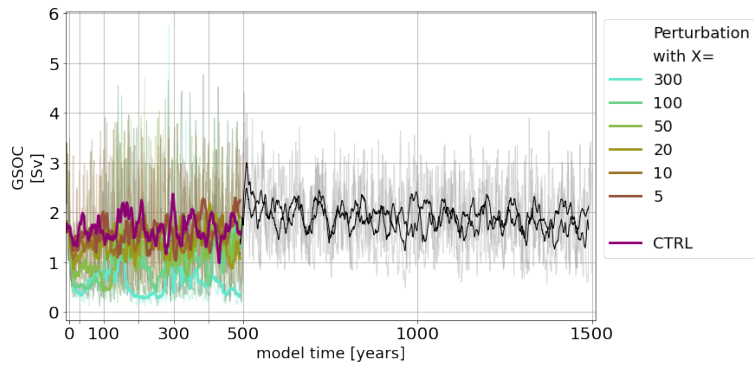

**Figure S4.** Times series of Greenland Sea overturning circulation [Sv]. Thin dark lines corresponds to the extension of the simulations with perturbation factors  $X=20$  and  $100$ , when the perturbation is halted.

Greenland Sea overturning circulation (GSOC) is computed as the maximum of the meridional stream function between  $68$  and  $75^{\circ}\text{N}$  (excluding the Baffin Bay) below  $500$  meters depth (it encompasses the north of the Iceland Sea and the Norwegian Sea).

## S5. Hydrography evolution of the Nordic Seas

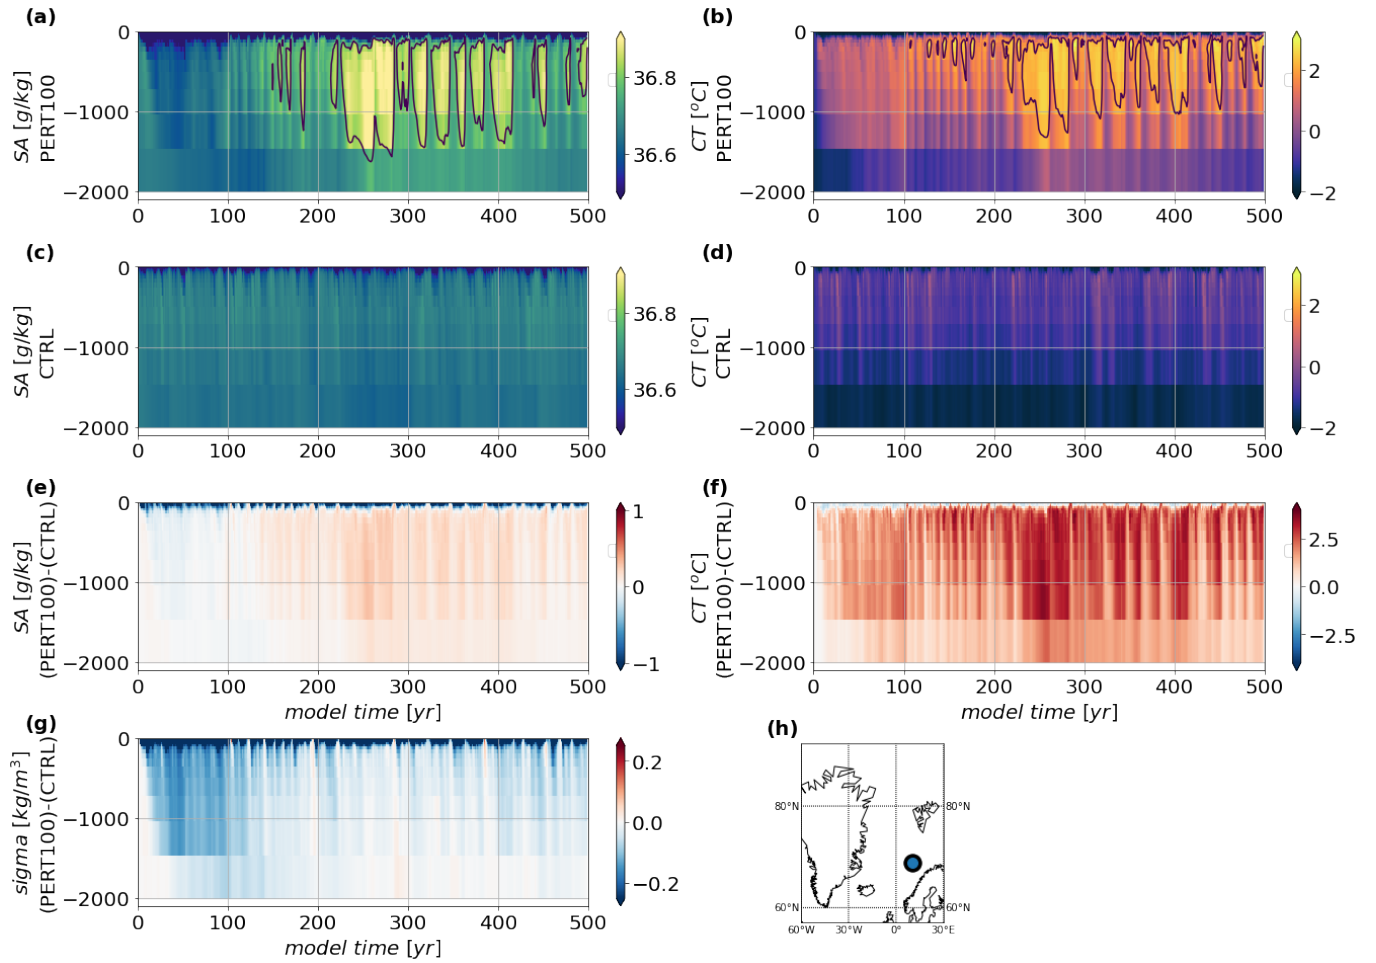

**Figure S5.** Hovmöller diagrams for one profile, at 71.5° and 10°E.

Absolute salinity [g/kg] (a) in the perturbation experiment with factor 100, (b) in the control experiment and (c) associated difference. (d)-(e)-(f) is the same for conservative temperature [°C]. (g) is the density [kg/m<sup>3</sup>] anomaly between the perturbation and the control. (h) Location of the profile. Black lines in (a) and (b) are 36.8 g/kg and 2 °C iso-contours.

## S6. Convection evolution

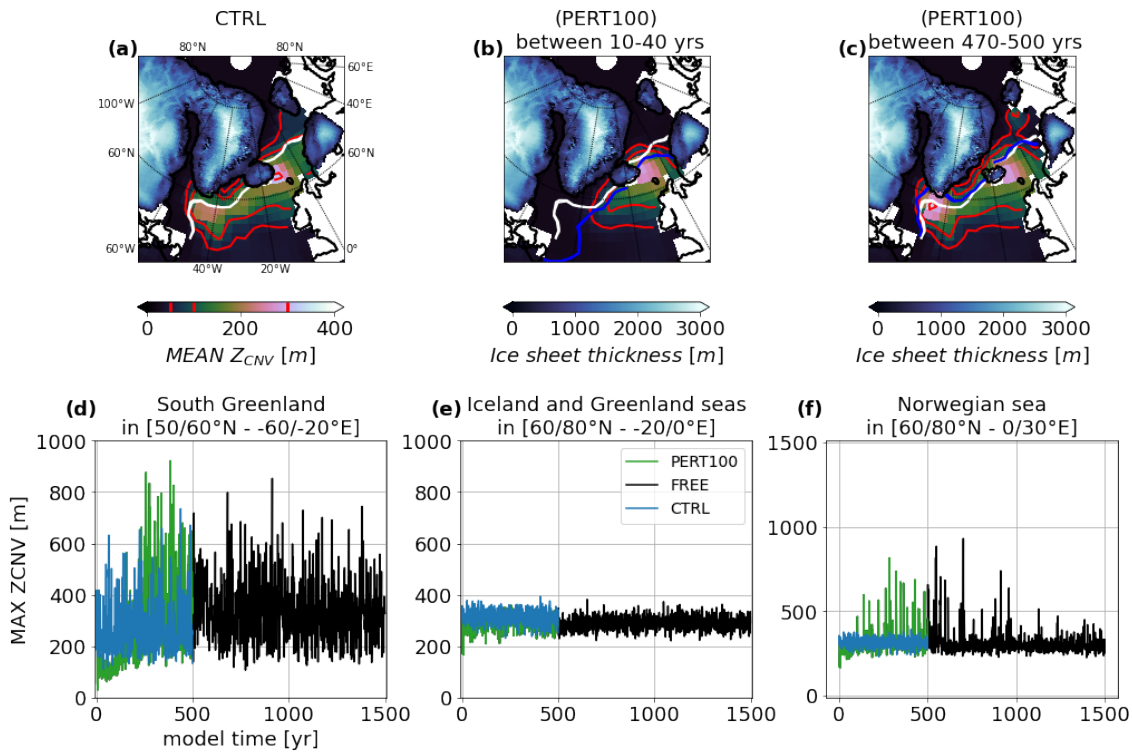

**Figure S6.**

Mean convection depth [m] (a) over the control simulation and in the perturbation experiment with factor 100 (b) averaged over 10-40 years and (c) over 400-450 years. White line (resp. dark blue) is the 30% sea-ice extent in the CTRL (resp. PERT100). Time series of annual maximum convection depth in three boxes : (d) south Greenland, (e) Iceland and Greenland seas and (f) Norwegian sea.

Here the convection depth,  $z_{cnv}$ , is defined as the depth for which the Brunt-Väisälä frequency sign changes and becomes negative (unstratified environment) starting from the bottom.

**S7. Ice sheet history in perturbation experiment with constant basal melt rates in the Baffin Bay**

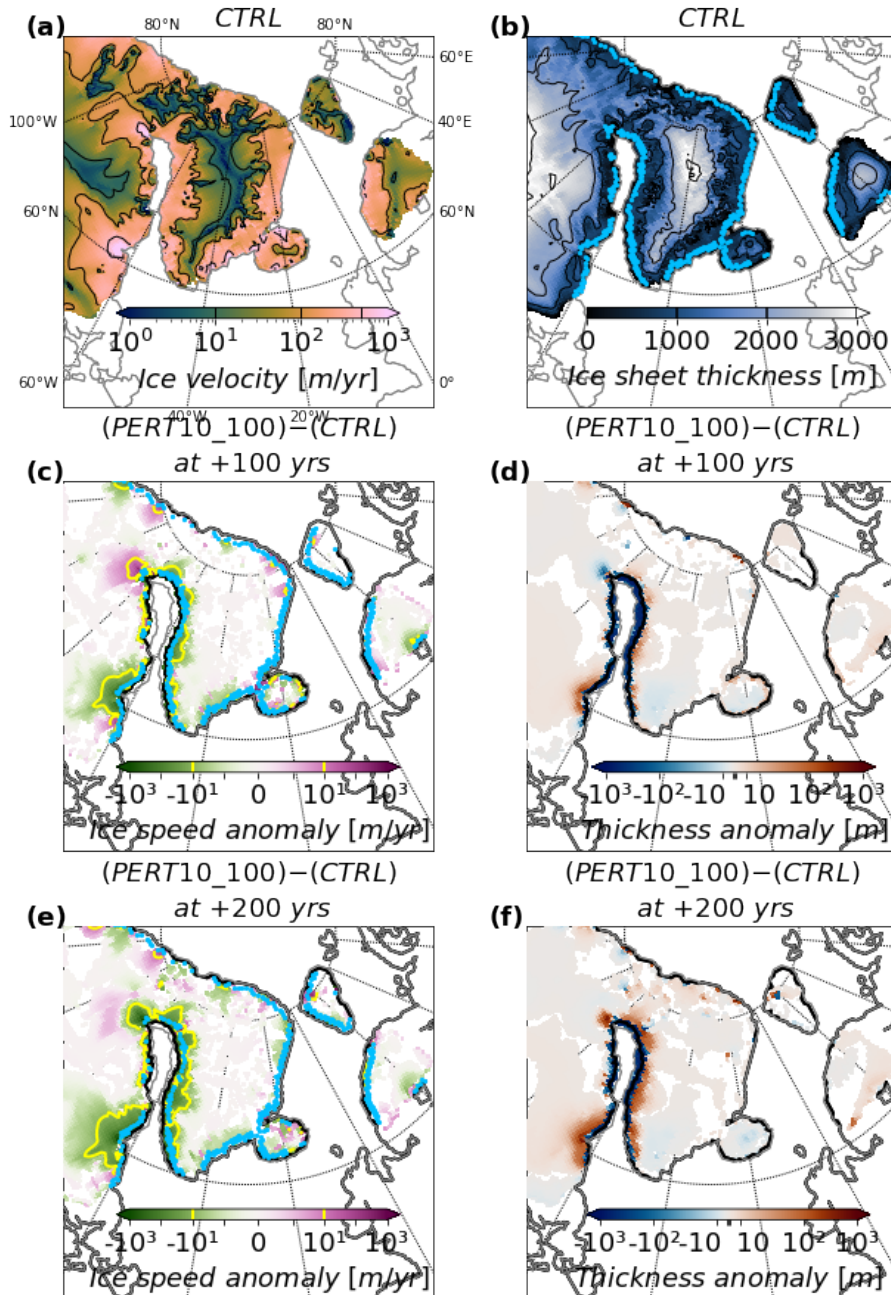

**Figure S7.** Ice sheet (a) velocity [m/yr] and (b) thickness [m] averaged over the control simulation. Sky blue contour indicates the position of the grounding line. PERT10\_100 - CTRL anomalies of (c) thickness, (d) ice velocities after 100 years. (e) and (f) after 200 years. Only significant values to one standard deviation of the control are shown for (c)-(f).

PERT10\_100 is the simulation with imposed constant oceanic basal melt rates of 10 m/yr in the Baffin Bay/Labrador Sea sector for 100 years.



S8. Pre-industrial bathymetry : Ice sheet initial condtions

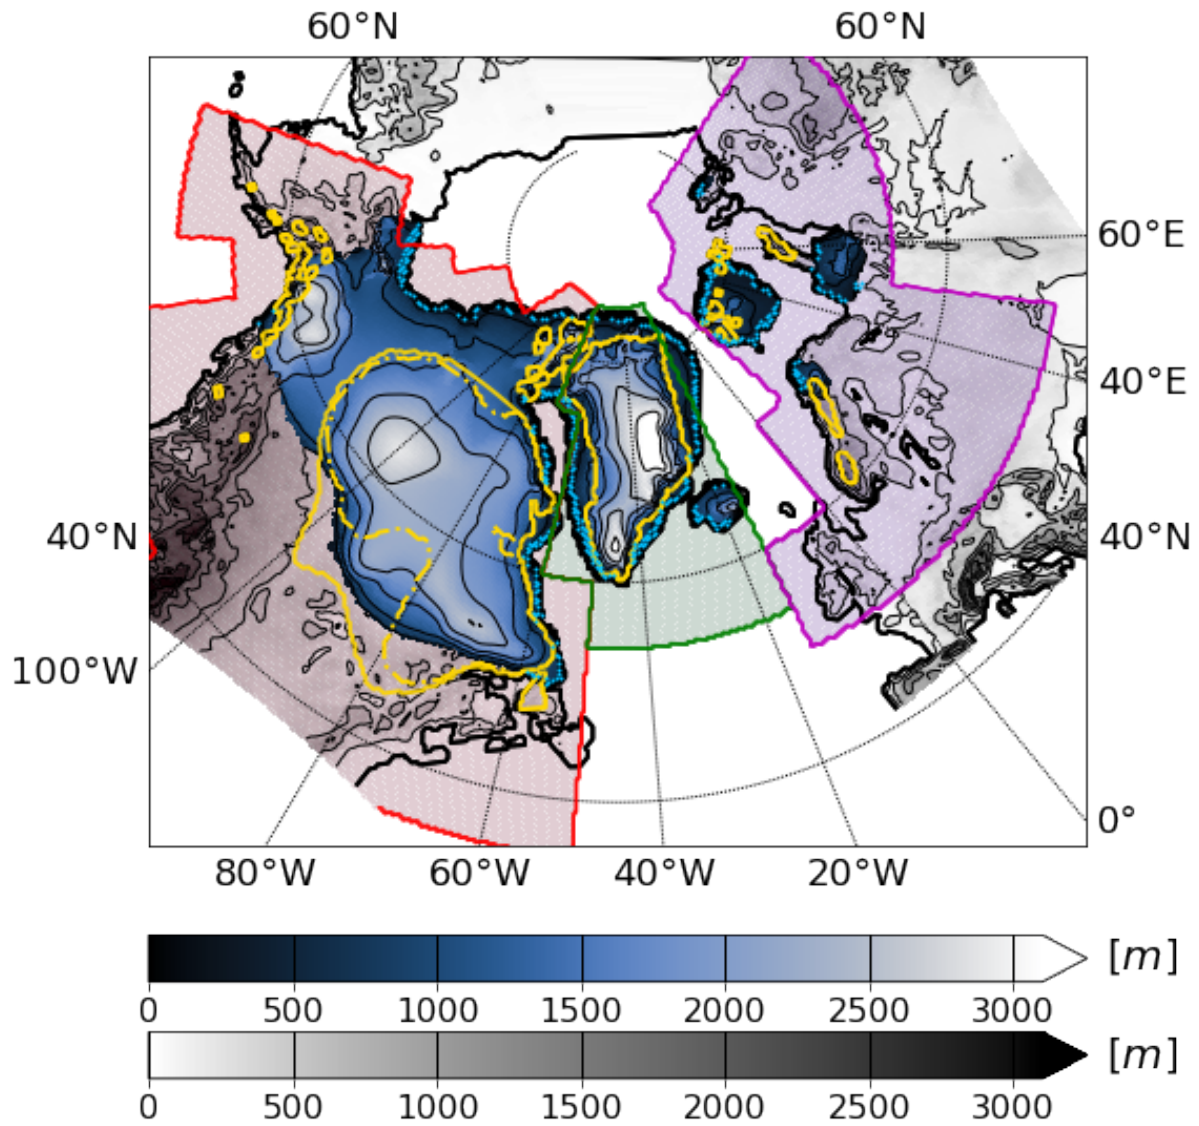

Figure S8. Equivalent of Figure 1 in the main text but with a Pre-industrial bathymetry.

## S9. Pre-industrial bathymetry : Ice sheet history

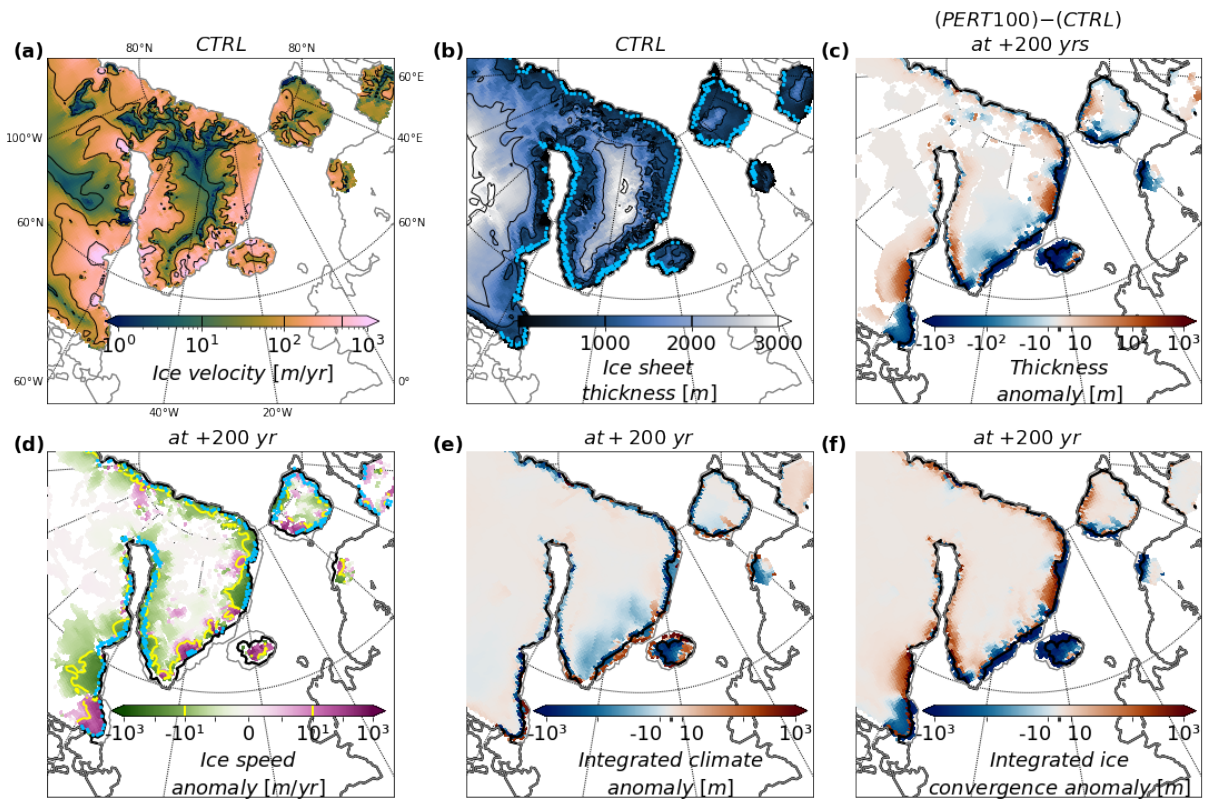

Figure S9. Equivalent of Figure 3 in the main text but with a Pre-Industrial bathymetry.

## S10. Pre-industrial bathymetry : Surface hydrography

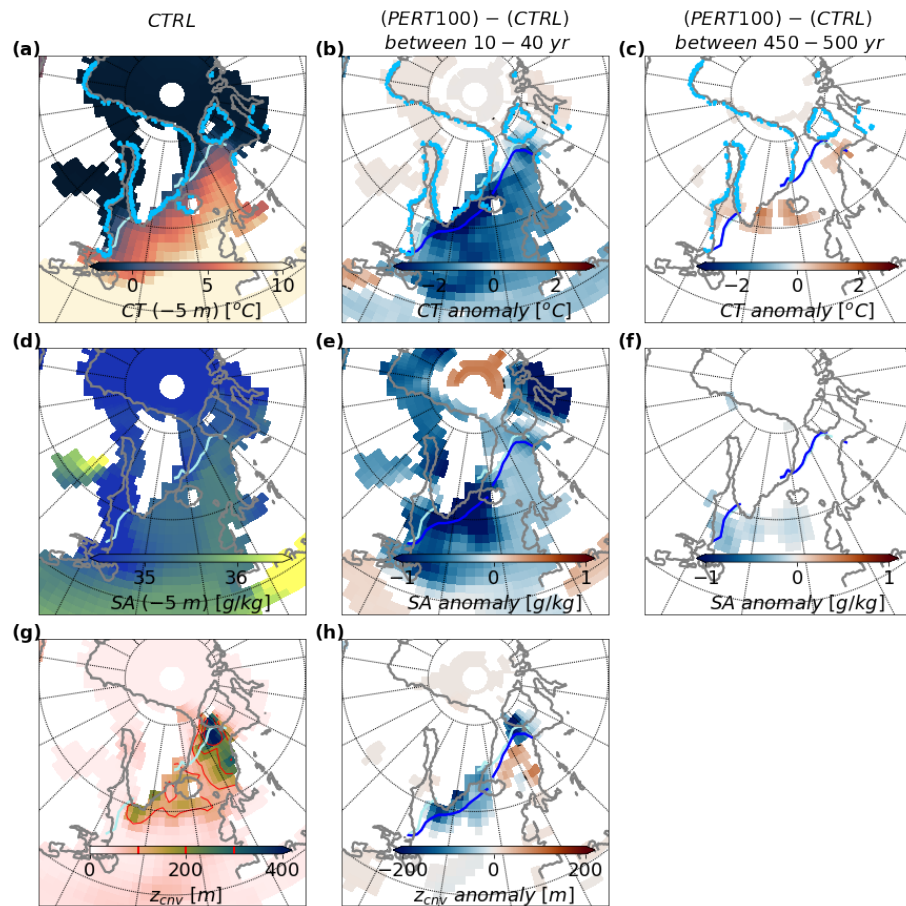

Figure S10. Equivalent of Figure 6 in the main text but with a Pre-Industrial bathymetry.

S11. Pre-industrial bathymetry : Sub-surface hydrography

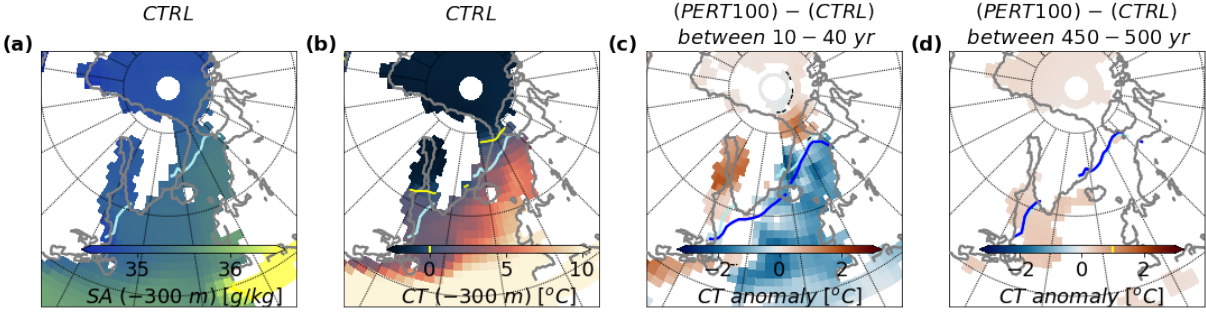

Figure S11. Equivalent of Figure 7 in the main text but with a Pre-Industrial bathymetry.

## S12. Ice volume evolution

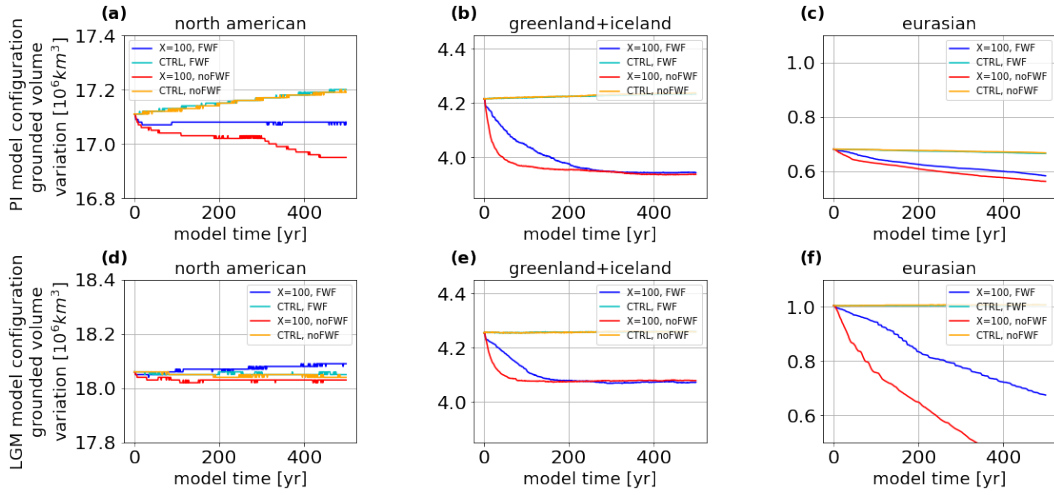

**Figure S12.** Continental ice volume response to oceanic perturbation (i.e. amplified OBM by a coefficient 100). Time series of grounded ice sheet volume [10<sup>6</sup> km<sup>3</sup>] for the (a) North American, (b) Greenland and Iceland and (c) Eurasian ice sheets in experiments with X=100 with the PI model configuration. (e)-(f)-(g) Same for the LGM model configuration. Note that the same y-axis spacing is applied on the plots (0.6 10<sup>6</sup> km<sup>3</sup>).

### S13. Ocean temperatures evolution

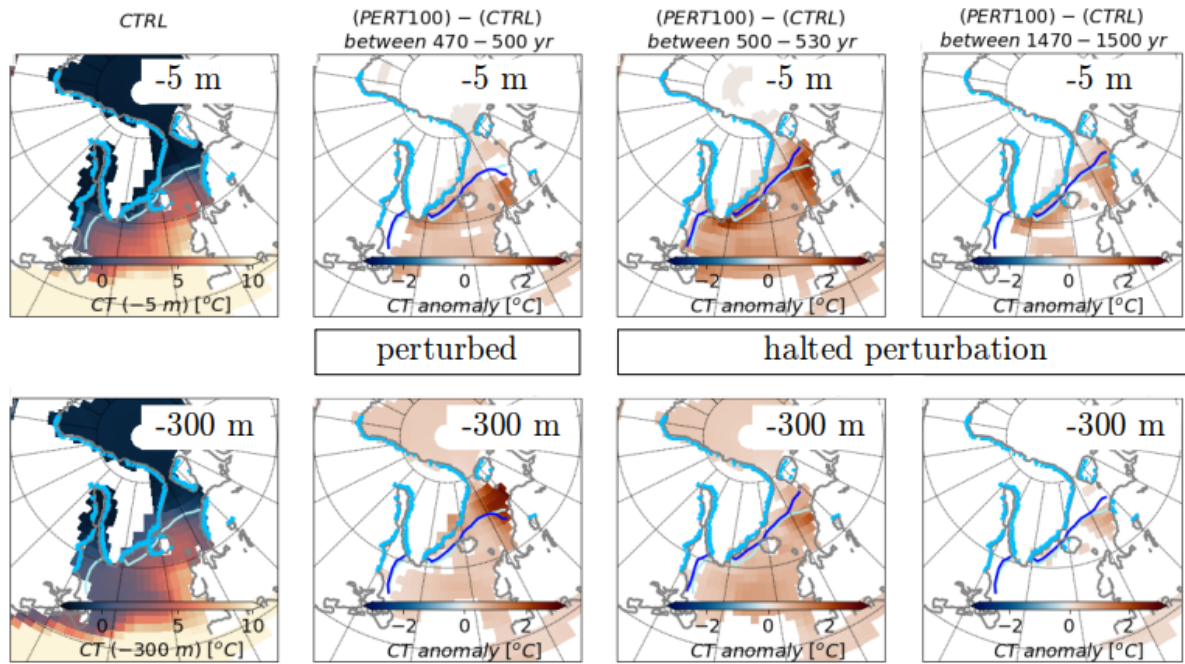

**Figure S13.** Conservative temperatures [ $^{\circ}\text{C}$ ] at (top) 5 m depth horizon and (bottom) 300 m depth horizon in (from left to right) the control and differences between PERT100 and the control between 470-500 years, 500-530 years and 1470-1500 years. Dark blue is the sea-ice contour and turquoise the position of the grounding line.

## Références

- [1] Goosse, Hugues, et al. "Description of the Earth system model of intermediate complexity LOVECLIM version 1.2." *Geoscientific Model Development* 3.2 (2010) : 603-633.
- [2] Shi, Yuhan, et al. "How parameter specification of an Earth system model of intermediate complexity influences its climate simulations." *Progress in Earth and Planetary Science* 6 (2019) : 1-18.
- [3] Bahadory, Taimaz, and Lev Tarasov. "LCice 1.0—a generalized Ice Sheet System Model coupler for LOVECLIM version 1.3 : description, sensitivities, and validation with the Glacial Systems Model (GSM version D2017. aug17)." *Geoscientific Model Development* 11.9 (2018) : 3883-3902.
- [4] Quiquet, Aurélien, et al. "The GRISLI ice sheet model (version 2.0) : calibration and validation for multi-millennial changes of the Antarctic ice sheet." *Geoscientific Model Development* 11.12 (2018) : 5003-5025.
- [5] Quiquet, Aurélien, et al. "Climate and ice sheet evolutions from the last glacial maximum to the pre-industrial period with an ice-sheet–climate coupled model." *Climate of the Past* 17.5 (2021) : 2179-2199.
